# Supplementary material for: Student Perceptions of Substance Use Disorder Stigma as a Factor for Health Disparities: A Mixed-Methods Study
Source: MDPI journal article supplement (doi:10.3390/pharmacy11040112), 2023-07-01
Supplement: s1 [file s1]

# Supplementary Material

**Table S1.** Student Respondent Characteristics.

|                                     | n          | %  |
|-------------------------------------|------------|----|
| Age (years)                         | 25 (SD: 4) |    |
| Sex                                 |            |    |
| Male                                | 74         | 20 |
| Female                              | 292        | 79 |
| Prefer not to answer                | 3          | 1  |
| Hispanic, Latino, or Spanish Origin |            |    |
| Yes                                 | 12         | 3  |
| No                                  | 357        | 97 |
| Race                                |            |    |
| American Indian or Alaska Native    | 3          | 1  |
| Asian Indian                        | 21         | 6  |
| Black or African American           | 55         | 15 |
| Chinese                             | 10         | 3  |
| Filipino                            | 5          | 1  |
| Japanese                            | 2          | 1  |
| Other Asian                         | 5          | 1  |
| Other Pacific Islander              | 1          | 0  |
| Some other race                     | 12         | 3  |
| Vietnamese                          | 4          | 1  |
| White                               | 248        | 68 |
| College                             |            |    |
| Dentistry                           | 3          | 1  |
| Graduate Health Sciences            | 21         | 6  |
| Health Professions                  | 42         | 11 |
| Medicine                            | 70         | 19 |
| Nursing                             | 51         | 14 |
| Pharmacy                            | 182        | 49 |

**Table S2.** Student respondent comparisons among reported college and selected survey questions.

| Dependent Variable                               | What College are you in? | What College are you in? | Sig.  |
|--------------------------------------------------|--------------------------|--------------------------|-------|
| Stigma currently exists in the healthcare field. | Dentistry                | Graduate Health Sciences | .879  |
|                                                  |                          | Health Professions       | .809  |
|                                                  |                          | Medicine                 | .991  |
|                                                  |                          | Nursing                  | 1.000 |
|                                                  |                          | Pharmacy                 | .991  |
|                                                  | Graduate Health Sciences | Dentistry                | .879  |
|                                                  |                          | Health Professions       | 1.000 |
|                                                  |                          | Medicine                 | .773  |
|                                                  |                          | Nursing                  | .134  |
|                                                  |                          | Pharmacy                 | .699  |
|                                                  | Health Professions       | Dentistry                | .809  |

|                                                                                          |                          |                          |       |
|------------------------------------------------------------------------------------------|--------------------------|--------------------------|-------|
| Stigma can lead to lower quality care provided to patients with substance use disorders. | Medicine                 | Graduate Health Sciences | 1.000 |
|                                                                                          |                          | Medicine                 | .327  |
|                                                                                          |                          | Nursing                  | .010  |
|                                                                                          |                          | Pharmacy                 | .179  |
|                                                                                          |                          | Dentistry                | .991  |
|                                                                                          |                          | Graduate Health Sciences | .773  |
|                                                                                          |                          | Health Professions       | .327  |
|                                                                                          |                          | Nursing                  | .536  |
|                                                                                          |                          | Pharmacy                 | 1.000 |
|                                                                                          |                          | Dentistry                | 1.000 |
|                                                                                          | Nursing                  | Graduate Health Sciences | .134  |
|                                                                                          |                          | Health Professions       | .010  |
|                                                                                          |                          | Medicine                 | .536  |
|                                                                                          |                          | Nursing                  | .375  |
|                                                                                          | Pharmacy                 | Dentistry                | .991  |
|                                                                                          |                          | Graduate Health Sciences | .699  |
|                                                                                          |                          | Health Professions       | .179  |
|                                                                                          |                          | Medicine                 | 1.000 |
|                                                                                          |                          | Nursing                  | .375  |
|                                                                                          | Dentistry                | Graduate Health Sciences | .996  |
|                                                                                          |                          | Health Professions       | .777  |
|                                                                                          |                          | Medicine                 | .999  |
|                                                                                          |                          | Nursing                  | 1.000 |
|                                                                                          |                          | Pharmacy                 | 1.000 |
|                                                                                          | Graduate Health Sciences | Dentistry                | .996  |
|                                                                                          |                          | Health Professions       | .490  |
|                                                                                          |                          | Medicine                 | 1.000 |
|                                                                                          |                          | Nursing                  | .985  |
|                                                                                          |                          | Pharmacy                 | .989  |
|                                                                                          | Health Professions       | Dentistry                | .777  |
|                                                                                          |                          | Graduate Health Sciences | .490  |
|                                                                                          |                          | Medicine                 | .059  |
|                                                                                          |                          | Nursing                  | .027  |
|                                                                                          |                          | Pharmacy                 | .005  |
|                                                                                          | Medicine                 | Dentistry                | .999  |
|                                                                                          |                          | Graduate Health Sciences | 1.000 |
|                                                                                          |                          | Health Professions       | .059  |
|                                                                                          |                          | Nursing                  | .995  |
|                                                                                          |                          | Pharmacy                 | .996  |
|                                                                                          | Nursing                  | Dentistry                | 1.000 |
|                                                                                          |                          | Graduate Health Sciences | .985  |
|                                                                                          |                          | Health Professions       | .027  |
|                                                                                          |                          | Medicine                 | .995  |
|                                                                                          |                          | Nursing                  | 1.000 |

|          |                          |       |
|----------|--------------------------|-------|
| Pharmacy | Dentistry                | 1.000 |
|          | Graduate Health Sciences | .989  |
|          | Health Professions       | .005  |
|          | Medicine                 | .996  |
|          | Nursing                  | 1.000 |

**Table S3.** Student respondent comparisons among reported race and selected survey questions.

|                                                                                               |                | Sum of Squares | df  | Mean Square | F     | Sig. |
|-----------------------------------------------------------------------------------------------|----------------|----------------|-----|-------------|-------|------|
| Stigma currently exists in the healthcare field.                                              | Between Groups | 6.362          | 10  | .636        | 1.277 | .242 |
|                                                                                               | Within Groups  | 175.825        | 353 | .498        |       |      |
|                                                                                               | Total          | 182.187        | 363 |             |       |      |
| Stigma can lead to patients' not receiving the appropriate care for a substance use disorder. | Between Groups | 11.476         | 10  | 1.148       | 2.362 | .010 |
|                                                                                               | Within Groups  | 171.524        | 353 | .486        |       |      |
|                                                                                               | Total          | 183.000        | 363 |             |       |      |
| Stigma can lead to lower quality care provided to patients with substance use disorders.      | Between Groups | 12.070         | 10  | 1.207       | 2.106 | .023 |
|                                                                                               | Within Groups  | 202.932        | 354 | .573        |       |      |
|                                                                                               | Total          | 215.003        | 364 |             |       |      |
